# Supplementary material
Source: PubMed Central journal article supplement (PMC7105004)
Supplement: mmc2.pdf [file mmc2.pdf]

# 1 Relating the overall reproduction number to the reproduction numbers of index and secondary cases

Let  $R_{overall}$  denote the number of new infections caused by each case, averaged over all cases. Let  $\mu$  be the average size of transmission chain (i.e. all cases that are linked to an index case). Then on average,  $\mu$  cases cause  $\mu - 1$  infections (because the index case is caused by any case in the chain). Therefore [Harris, 2002, Lange, 2010],

$$R_{overall} = \frac{\mu - 1}{\mu} \quad (1)$$

$$\mu = \frac{1}{1 - R_{overall}} \quad (2)$$

Meanwhile the index case is expected to generate  $R_i$  cases in the first generation of secondary cases. These cases are expected to generate  $R_i \cdot R_s$  cases in the second generation. These in turn produce  $R_i \cdot R_s^2$  cases in the third generation and so forth. Therefore,

$$\mu = 1 + R_i + R_i \cdot R_s + R_i \cdot R_s^2 + \dots \quad (3)$$

$$= 1 + \frac{R_i}{1 - R_s} \quad (4)$$

Equating the two formulas for  $\mu$  and rearranging gives,

$$\mu = \frac{1}{1 - R_{overall}} = 1 + \frac{R_i}{1 - R_s} \quad (5)$$

$$R_{overall} = 1 - \frac{1 - R_s}{1 - R_s + R_i} \quad (6)$$

$$R_{overall} = \frac{R_i}{1 - R_s + R_i} \quad (7)$$

## 2 Adjusting observed $R_i$ and $R_{overall}$ for the proportion of asymptomatic index cases that are unobserved

Here we consider adjustments to the observed value of  $R_i$  and  $R_{overall}$  for the possibility that asymptomatic, unobserved index cases were not incorporated into the initial data analysis. We assume that the proportion of symptomatic, observed index cases is  $\rho_{i,c}$  and that the proportion of unobserved index cases is  $1 - \rho_{i,c}$ . Let  $R_i^o$  and  $R_{overall}^o$  and  $\mu^o$  represent the values of  $R_i, R_s$  and the average chain size based solely on observed data. Let  $R_i^a$  and  $R_{overall}^a$  and  $\mu^a$  represents the corresponding values, once adjusted for unobserved asymptomatic index cases.

Recognizing that  $R_i^a$  has a contribution from both symptomatic and asymptomatic cases,

$$R_i^a = \rho_{i,c} \cdot R_i^o + (1 - \rho_{i,c}) \cdot 0 \quad (8)$$

$$R_i^a = \rho_{i,c} \cdot R_i^o \quad (9)$$

Likewise, given that asymptomatic index cases result in a transmission chain of size one,

$$\mu_i^a = \rho_{i,c} \cdot \mu_i^o + (1 - \rho_{i,c}) \cdot 1 \quad (10)$$

Coupling this to equation 1,

$$\frac{1}{1 - R_{overall}^a} = \frac{\rho_{i,c}}{1 - R_{overall}^o} + (1 - \rho_{i,c}) \cdot 1 \quad (11)$$

$$R_{overall}^a = 1 - \frac{1}{\frac{\rho_{i,c}}{1 - R_{overall}^o} + (1 - \rho_{i,c})} \quad (12)$$

## References

- [Harris, 2002] Harris, Theodore E. 2002. *The Theory of Branching Processes*. Toronto: Dover.
- [Lange, 2010] Lange, Kenneth. 2010. *Applied Probability*. Second edn. New York: Springer.
